# Supplementary material for: Constitutive BAK/MCL1 complexes predict paclitaxel and S63845 sensitivity of ovarian cancer
Source: PubMed Central journal article supplement (PMC8361168; doi:10.1038/s41419-021-04073-0), 2021-08-12
Supplement: 41419_2021_4073_MOESM14_ESM.pdf [file 41419_2021_4073_MOESM14_ESM.pdf]

Please complete the table below to indicate the contributions of all named authors to the figures.

Figure 1:

|  |
|--|
|  |
|--|

Figure 2:

|  |
|--|
|  |
|--|

Figure 3:

|  |
|--|
|  |
|--|

Figure 4:

|  |
|--|
|  |
|--|

Figure 5:

|  |
|--|
|  |
|--|

Figure 6:

|  |
|--|
|  |
|--|

**Signed** for and on behalf of the Author(s):

Print Name:

Date:

*Hang Dai*

|  |
|--|
|  |
|--|

|  |
|--|
|  |
|--|
