# Supplementary material for: Constitutive BAK/MCL1 complexes predict paclitaxel and S63845 sensitivity of ovarian cancer
Source: PubMed Central journal article supplement (PMC8361168; doi:10.1038/s41419-021-04073-0), 2021-08-12
Supplement: 41419_2021_4073_MOESM15_ESM.pdf [file 41419_2021_4073_MOESM15_ESM.pdf]

Please complete the table below to indicate the contributions of all named authors to the figures.

Figure 7:

|  |
|--|
|  |
|--|

Figure 8:

|  |
|--|
|  |
|--|

Figure 9:

|  |
|--|
|  |
|--|

Figure 10:

|  |
|--|
|  |
|--|

Figure 11:

|  |
|--|
|  |
|--|

Figure 12:

|  |
|--|
|  |
|--|

Signed for and on behalf of the Author(s):

*Hang Dai*

Print Name:

|  |
|--|
|  |
|--|

Date:

|  |
|--|
|  |
|--|
